# Supplementary material for: Genome and epigenome analysis of monozygotic twins discordant for congenital heart disease
Source: BMC Genomics. 2018 Jun 4;19:428. doi: 10.1186/s12864-018-4814-7 (PMC5987557; doi:10.1186/s12864-018-4814-7)
Supplement: Supplementary file 1 — Table S1. Overview of WGS data. (XLSX 39 kb) [file 12864_2018_4814_MOESM1_ESM.xlsx]

## Sheet: Sheet1
Overview of whole genome sequencing
	D3	D4
raw reads	787646142	774811666
raw data(G)	118.15	116.22
clean reads	785924262	772081918
mapped reads	783987502	769549780
mapped rate	0.9975	0.9967
Properly mapped:	756347464 (96.24%)	736606014 (95.41%)
Average_sequencing_depth	31.9	28.5
Coverage	0.9159	0.9162
Coverage_at_least_4X	0.9118	0.9119
Coverage_at_least_10X	0.8926	0.8905
